# Supplementary material for: UAV-enabled reconnaissance and trajectory modeling of a co-seismic rockfall in Lefkada
Source: Copernicus journal article supplement (doi:10.5194/nhess-2017-29), 2017-02-16
Supplement: Supplementary file [file nhess-2017-29-RC1-supplement.pdf]

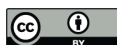

## UAV-enabled reconnaissance and trajectory modeling of a co-seismic rockfall in Lefkada

Charalampos Saroglou<sup>1\*</sup>,

Pavlos Asteriou<sup>1</sup>

Dimitris Zekkos<sup>2</sup>

George Tsiambaos<sup>1</sup>

Marin Clark<sup>3</sup>

John Manousakis<sup>4</sup>

<sup>1</sup>Department of Geotechnical Engineering, School of Civil Engineering, National Technical  
University of Athens

<sup>2</sup>Department of Civil and Environmental Engineering, University of Michigan, USA

<sup>3</sup>Department of Earth and Environmental Science, University of Michigan, USA

<sup>4</sup>Elxis Group, S.A, Athens, Greece

\* corresponding author: [saroglou@central.ntua.gr](mailto:saroglou@central.ntua.gr)

### Abstract

The paper presents the field evidence and the kinematical study of the motion of a rock block mobilised by an earthquake-induced rockfall in Ponti area in the island of Lefkada during a  $M_w$  6.5 earthquake on 17<sup>th</sup> November 2015. A detailed field survey was deployed using an Unmanned Aerial Vehicle (UAV) with an ultra-high definition (UHD) camera, which produced a high-resolution orthophoto and a Digital Surface Model (DSM) of the terrain. The sequence of impact marks from the rock trajectory on the ground surface was identified using the orthophoto and verified through a detailed field survey. Additionally, the earthquake characteristics were determined in order to define the acceleration on the rock slope and the initial conditions of the detached block. Using the impact points from the actual rockfall trajectory, an analytical approach to reconstruct the trajectory was implemented, which led to some insights on the coefficients of restitution. In order to match the actual trajectory, 2D and 3D rockfall analyses were performed using the recommended set of parameters.

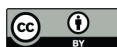

31 However, the actual trajectory could not be accurately predicted, revealing limitations  
32 of existing models.

### 33 **Keywords**

34 Rockfall, earthquake, DEM, modelling, restitution, UAV

## 35 **1. Introduction**

36 Active faulting, rock fracturing and high rates of seismicity contribute to common  
37 rockfall hazards in Greece. Rockfalls primarily damage roadways and houses  
38 (Saroglou, 2013) and are most often triggered by rainfall and secondly seismic  
39 loading. Additionally in recent years, some rockfalls have impacted archaeological  
40 sites (Marinos & Tsiambaos, 2002, Saroglou et al., 2012). The Ionian Islands, which  
41 includes Lefkada Island, experience frequent  $M_w$  5-6.5 earthquakes, as well as less  
42 frequent larger (up to 7.5) earthquakes. The historical seismological record is  
43 particularly well constrained with reliable detailed information for at least 23 events  
44 since 1612, which induced ground failures at the island of Lefkada (Papathanasiou et  
45 al. 2005) and an average of a damaging earthquake every 18 years. In the recent  
46 past, a  $M_w$  6.2 earthquake occurred on August 14 2003 and was located offshore the  
47 NW coast of Lefkada. Significant damage was reported, particularly in the town of  
48 Lefkada, where a PGA of 0.42g was recorded. Landslides, rockslides and rockfalls  
49 occurred along the western coast of the island (Karakostas et al. 2004,  
50 Papathanasiou et al., 2012).

51 On November 17<sup>th</sup> 2015, an  $M_w$  6.5 earthquake struck the island of Lefkada and  
52 triggered a number of landslides, rockfalls and some structural damage. The most  
53 affected area by large rockslides was the west coast of the island, especially along its  
54 central and south portion which are popular tourist destinations (Zekkos et al., 2017).  
55 The landslides completely covered the majority of the west coast beaches and  
56 damaged access roads.

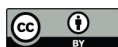

57 A rockfall in Ponti village, which lies in the southeast side of Lefkada near the Gulf of  
58 Vassiliki, was triggered during this earthquake and was responsible for one of two  
59 deaths caused by the earthquake. Of particular interest is the very long travel path of  
60 the rock block, which was about 800 m in plan view from the point of detachment to  
61 the end of its path. Near the end of the rock fall path, the block impacted a family  
62 residence, penetrated two brick walls and killed a person in the house. The block  
63 exited through the back of the house and came to rest in the property's backyard.

64 The Ponti village rockfall site is characteristic of earthquake induced rockfall and an  
65 example of how seismically-induced rockfall impacts human activities. It also  
66 exemplifies the limitations of common 2D rockfall analysis to predict specific aspects  
67 of the rockfall trajectory as measured by field evidence. In order to create a highly  
68 accurate model of the rockfall propagation in 2D and 3D space, the rock path and the  
69 impact point on the slope was identified by a field survey. The study was performed  
70 using an Unmanned Aerial Vehicle (UAV) with an ultra-high definition (UHD) camera,  
71 which produced a high-resolution orthophoto and a Digital Surface Model (DSM) of  
72 the terrain. The orthophoto was used to identify the rolling section and the bouncing  
73 points of the rock along its trajectory. The high-resolution DSM made it possible to  
74 perform kinematical rebound analysis and a 3D rockfall analysis.

## 75 2. Ponti rockfall - site conditions

76 The slope overhanging Ponti village is formed in limestone and has a maximum  
77 height of 600 m and an average slope angle of  $35^{\circ}$  to  $40^{\circ}$  (Figure 1). The geological  
78 formations at the Ponti rockfall site are limestones covered by moderately cemented  
79 talus materials. The thickness of the talus materials ranges between 0.5 and 4.0 to  
80 5.0 m. A few fallen limestone blocks were identified on the scree slope, with volumes  
81 between 0.5 and  $2 \text{ m}^3$ . Based on the size distribution of these rocks on the slope, the  
82 average expected block volume would be in the order of 1 to  $2 \text{ m}^3$ .



83 The rockfall release area was at an elevation of 500 m, while the impacted house at  
84 an elevation of 130 m (Figure 2). The volume of the detached limestone block was  
85 approximately 2 m<sup>3</sup> and its dimensions equal to 1.4 m x 1.4 m x 1 m. There was no  
86 previous rockfall incident reported for the specific slope that impacted the road or  
87 house.

### 88 3. UAV mapping

#### 89 3.1. Introduction

90 A quadrotor UAV (Phantom 3 professional) was deployed to reach the uphill terrain  
91 that was practically inaccessible. The UAV was equipped with an Ultra-high definition  
92 (UHD) 12 MP camera and has the capacity to collect 4K video. The first objective of  
93 the UAV deployment was to find the initiation point of the rock and then identify the  
94 rockfall path (shown in Fig. 1). A particular focus on that part of the task was the  
95 identification of rolling and bouncing sections of the rockfall path. In addition, in order  
96 to generate a high-resolution orthophoto of the rockfall trajectory, aerial video  
97 imagery was collected, and the resulting digital surface model (DSM) was used to  
98 perform rockfall analysis. Structure-from-Motion (SfM) methodologies were  
99 implemented to create a 3D point cloud of the terrain and develop a 3D model by  
100 identifying matching features in multiple images. Compared to classic photogrammetry  
101 methodologies, where the location of the observing point is well established, SfM  
102 tracks specific discernible features in multiple images, and through non-linear least-  
103 squares minimisation (Westoby et al., 2012), iteratively estimates both camera  
104 positions, as well as object coordinates in an arbitrary 3D coordinate system. In this  
105 process, sparse bundle adjustment (Snavely et al., 2008) is implemented to  
106 transform measured image coordinates to three dimensional points of the area of  
107 interest. The outcome of this process is a sparse 3D point cloud in the same local 3D  
108 coordinate system (Micheletti et al., 2015). Paired with GPS measurements of a  
109 number of control points (in this case 10 fast-static GPS points) at the top, middle



110 and bottom of the surveyed area, the 3D model is georeferenced to a specific  
111 coordinate system.

### 112 3.2. High-resolution Orthophoto

113 A 5cm pixel size orthophoto was generated based on the methodology outlined  
114 earlier. As shown in Fig. 3, the rolling section and the bouncing locations of the rock  
115 block throughout its course were identified. The rolling section is discerned as a  
116 continuous and largely linear mark left in the densely vegetated terrain that is  
117 indicative of the damage caused. Impact points that are part of the bouncing section  
118 of the rock, are identified as circular to ellipsoidal bare earth craters with no  
119 disturbance in between. The last bouncing point before impacting the house is clearly  
120 identified on the paved road. The plan view ortho-imagery, along with the original  
121 footage of the video collected was crucial to the qualitative identification of these  
122 features. The alternative, i.e., land-based, conventional field reconnaissance was  
123 practically impossible to perform in the densely vegetated and steep terrain.

### 124 3.3. Digital Surface Model

125 A profile section and a 10 cm Digital Surface Model (DSM) paired with the plan view  
126 orthophoto were first developed (Manousakis et al., 2016) and made possible the  
127 identification of terrain features such as structures, slope benches or high trees, that  
128 could affect the rock's path downhill. However, this resolution of the DSM proved to  
129 be not only unnecessarily high and thus difficult to manipulate in subsequent rockfall  
130 analyses, but also resulted in numerical instabilities during the rockfall analyses.  
131 Therefore, a downscaled 2 m DSM was produced for the rockfall analysis. This was  
132 implemented through an aggregate generalization scheme where each output cell is  
133 assigned the minimum of the input cells that are encompassed by that cell. In  
134 addition, noise filtering and smoothing processing were implemented to reduce the  
135 effect of construction elements and vegetation in the final rasterized model. Note that



136 this resolution is still higher than the resolution of DSM that are used in rockfall  
137 analyses.

## 138 **4. Earthquake characteristics – Initial conditions**

### 139 **4.1. Seismic acceleration**

140 The epicenter of the earthquake according to the National Observatory of Athens,  
141 Institute of Geodynamics (NOA) is located onshore near the west coast of Lefkada.  
142 The causative fault is estimated to be a near-vertical strike-slip fault with dextral  
143 sense of motion (Ganas et al., 2015, 2016). Based on the focal mechanism study of  
144 the earthquake it was determined that the earthquake was related to the right lateral  
145 Kefalonia-Lefkada Transform Fault (KLTF), which runs nearly parallel to the west  
146 coasts of both Lefkada and Kefalonia island, in two segments (Papazachos et al.  
147 1998, Rondoyanni et al. 2012). The previous earthquake in this zone occurred in  
148 August 2003 with a magnitude of 6.2.

149 A strong motion station recorded the ground motions in the village of Vasiliki located  
150 at a distance of 2.5 km from the site. The ground motion characteristics of the  
151 recording are summarized in Table 1 and are presented in Figure 4, according to an  
152 ITSAK preliminary report (ITSAK, 2016). In comparison with the recordings at other  
153 locations in Central Ionian, it was evident that the strongest acceleration was  
154 encountered in Vasiliki area.

### 155 **4.2. Topography effect**

156 Peak ground acceleration along the rock slope is the intensity of base shaking  
157 modified by site and topographic effects (Mavrouli et al., 2009). In the present case,  
158 local shaking intensity in terms of horizontal PGA was considered. The E-W  
159 component of acceleration was considered for the determination of the initial  
160 velocity. The peak ground acceleration (PGA) on the slope face ( $PGA_{sf}$ ) was obtained  
161 by linear interpolation between the acceleration at the base ( $PGA_b$ ) and at the slope



crest ( $PGA_{cr}$ ). The acceleration at the base was equal to 0.32g and thus at the crest  
 $PGA_{cr} = 1.5 PGA_b$  equal to 0.48. Therefore, the seismic acceleration on the slope at  
 the detachment point was calculated equal to 0.45 g.

#### 4.3. Assessment of rock block's initial velocity

The initial horizontal velocity of the block, at the time of detachment, was calculated  
 considering equilibrium of the produced work and the kinetic energy according to  
 equation 1.

$$v = \sqrt{2 \cdot PGA_{sf} \cdot s} \quad (1),$$

where  $PGA_{sf}$  is the acceleration on the slope at the location of detachment and  $s$  the  
 initial displacement of the block in order to initiate its downslope movement.

The initial horizontal velocity was calculated equal to 0.67 m/sec, considering a  
 displacement in the order of  $s = 0.05$  m. The vertical component of the initial velocity  
 is assumed to be zero.

### 5. Trajectory analysis

In order to estimate the possible rock paths and design remedial measures,  
 simulation programs are used in design practice, which are mostly based on the  
 lumped-mass analysis model. The trajectory of a block is modelled as a combination  
 of four motion types; free falling, bouncing, rolling and sliding (Descoeudres and  
 Zimmermann, 1987).

#### 5.1. Modelling the response to an impact

The most critical input parameters are the coefficients of restitution (COR), which  
 control the bouncing of the block. In general, the coefficient of restitution (COR) is  
 defined as the decimal fractional value representing the ratio of velocities (or  
 impulses or energies; depending on the definition used) before and after an impact of  
 two colliding entities (or a body and a rigid surface). When in contact with the slope,

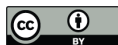

187 the block's magnitude of velocity changes according to the COR value. Hence, COR  
 188 is assumed to be an overall value that takes into account all the characteristics of the  
 189 impact; including deformation, sliding upon contact point, transformation of rotational  
 190 moments into translational and vice versa (Giani, 1992).

191 The most widely used definitions originate from the theory of inelastic collision as  
 192 described by Newtonian mechanics. For an object impacting a rocky slope (Figure 5),  
 193 which is considered as a steadfast object, the kinematic COR ( $V_{COR}$ ) is defined  
 194 according to Eq. 2.

$$195 \quad V_{COR} = \frac{v_r}{v_i} \quad (2)$$

196 where  $v$  is the velocity magnitude and the subscripts  $i$  and  $r$  denote the trajectory  
 197 stage; incident (before impact) and rebound (after impact) respectively.

198 Two different mechanisms participate in the energy dissipation process; energy loss  
 199 normal to the slope is attributed to the deformation of the colliding entities, and in the  
 200 tangential direction is due to friction between them. Therefore kinematic COR has  
 201 been analyzed to the normal and tangential component with respect to the slope  
 202 surface, defining the normal ( $n_{COR}$ ) and the tangential ( $t_{COR}$ ) coefficient of restitution  
 203 (Eq. 3 and 4 respectively).

$$204 \quad n_{COR} = \frac{v_{n,r}}{v_{n,i}} \quad (3)$$

205 and

$$206 \quad t_{COR} = \frac{v_{t,r}}{v_{t,i}} \quad (4)$$

207 where the first subscript,  $n$  or  $t$  denotes the normal or the tangential components of  
 208 the velocity respectively.





209 Normal and tangential COR have prevailed in natural hazard mitigation design via  
 210 computer simulation due to their simplicity. Values for the coefficients of restitution  
 211 are acquired from values recommended in the literature (Azzoni et al. 1995;  
 212 Heidenreich 2004; Richards et al. 2001, RocScience, 2004). Those are mainly  
 213 related to the surface material type and originate from experience, experimental  
 214 studies or back analysis of previous rockfall events. This erroneously implies that  
 215 coefficients of restitution are material constants. However, COR values depend on  
 216 several parameters that cannot be easily assessed. Moreover, the values suggested  
 217 by different authors vary considerably and are sometimes contradictory.

218 Usage of the lump-mass model has some key limitations; the block is described as  
 219 rigid and dimensionless with an idealized shape (sphere); therefore the model  
 220 neglects the block's actual shape and configuration at impact, even though it is  
 221 evident that they both affect the resulting motion.

## 222 **5.2. Rockfall path characteristics**

223 23 impact points were identified on the slope surface (Figure 6). Their coordinates  
 224 are presented in Table 2, along block's path starting from the detachment point  
 225 (where  $x=0$ ).

226 The apparent dip of the slope at impact positions was measured from the  
 227 topographic map; on each impact point a line was set with a length twice the block's  
 228 mean dimension, oriented according to preceding trajectory direction. Moreover, the  
 229 impact point was expanded on the topographic map to a rectangular plane with a  
 230 side twice as much the mean dimension of the block (Figure 7). This plane was then  
 231 oriented so that one side coincides with the strike direction and its' vertical side  
 232 toward to the dip direction. Thus, direction difference,  $\Delta\phi$ , was measured by the  
 233 strike direction and the preceding path and deviation,  $e$ , was measured as the angle  
 234 between pre and post impact planes (Asteriou & Tsiambaos, 2016).



235 Having a detailed field survey of the trajectory path, a back analysis according to the  
 236 fundamental kinematic principles was performed in order to back-calculate the actual  
 237 COR values.

### 238 **5.3. Kinematic analysis and assumptions**

239 The 23 impact points identified on the slope comprise a rockfall path of 22 parabolic  
 240 segments. The vertical and horizontal length of each segment is acquired by  
 241 subtracting consecutive points. Since no external forces act while the block is in the  
 242 air, each segment lays on a vertical plane and is described by the general equation  
 243 of motion as:

$$244 \quad y = x \tan \vartheta - \frac{gx^2}{2v^2} \sec^2 \vartheta \quad (5)$$

245 where:  $\theta$  the launch angle from the horizon and  $v$  the launch (initial) velocity (Figure  
 246 8).

247 Since no evidence can be collected regarding launch angle and velocity, innumerable  
 248 parabolas satisfy Eq. 5. However,  $\theta$  is bound between  $-\beta$  and  $90^\circ$ , so in order to  
 249 acquire realistic values for the initial velocity, its sensitivity for that given range was  
 250 addressed (Figure 9).

251 For the case presented in Fig. 9 (the first parabolic segment) it is seen that for the  
 252 majority of the release angles, initial velocity variation is low and ranges between 7.2  
 253 and  $12\text{ms}^{-1}$ . Additionally, the relationship between release angle and initial velocity is  
 254 expressed by a curvilinear function, thus a minimum initial velocity value along with  
 255 its release angle (denoted hereafter as  $\theta_{cr}$ ) can be easily acquired.

256 Given the minimum initial velocity and the critical release angle for each parabolic  
 257 segment, the impact velocity and angle can be calculated. Afterwards, normal and  
 258 tangential velocity components according to the apparent dip of the impact area, are  
 259 calculated in order to evaluate COR values. Results are summarized in Table 3.



#### 260 **5.4. Coefficients of restitution**

261 It is observed that  $v_{cor}$  (Table 3) is slightly greater than one in 5 out of 22 impacts.  
 262 According to Eq. 3, this can only be achieved when impact velocity is less than  
 263 rebound velocity. However, this indicates that energy was added to the block during  
 264 contact, which is not possible according to the law of conservation of energy. Thus,  
 265 impact velocity should be greater, which is possible if the launch velocity of the  
 266 previous impact was more than the minimum, as assumed.

267 Omitting the impacts with  $V_{cor} > 1$ , it is observed that kinematic COR ranges between  
 268 0.55 and 1.0 and presents smaller variation compared to normal or tangential  
 269 coefficient of restitution, similar to what was previously reported in relevant literature  
 270 (i.e. Asteriou et al, 2012; Asteriou & Tsiambaos, 2016).

271 The considerably wide scatter of normal COR implies that the restitution coefficient  
 272 cannot be a material constant. Yet, in most relevant software, normal COR is defined  
 273 solely by the slope material. Moreover, normal COR values higher than one were  
 274 calculated in 11 out of the 15 remaining impacts. Normal COR higher than one have  
 275 been observed in both experimental (e.g. Asteriou et al., 2012) and back-analysis  
 276 studies (e.g. Paronuzzi, 2009). However, in relevant software normal COR values are  
 277 bounded between 0 and 1.

278 Moreover, it is observed in Fig. 10 that normal COR increases as the impact angle  
 279 reduces, similarly to previous observations by Giacomini et al. (2012), Asteriou et al.  
 280 (2012) and Wyllie (2014). The correlation proposed by Wyllie (2014) is also plotted in  
 281 Figure 11 and seems to describe consistently, but on the unconservative side, the  
 282 trend and the values acquired by the aforementioned analysis and assumptions.

283

## 284 **6. Rockfall modelling**

### 285 **6.1. 2-D software**



286 Initially, a deterministic 2D rockfall analysis was performed using Rocfall software  
287 (RocScience, 2004). Considering an initial velocity of 0.67 m/sec, the falling rock  
288 primarily rolls on the slope and stops much earlier than its actual run out distance,  
289 approximately 400 m downslope from its starting point (Fig. 6; case 1). The restitution  
290 coefficients were  $n_{COR}=0.35$ ,  $t_{COR}=0.85$ , which represent properties of bedrock  
291 outcrops according to the suggested values provided in the documentation of the  
292 software. The friction angle was set to zero. If the friction angle is set to  $\varphi=32^\circ$  (as  
293 suggested by the software documentation), the rock travels downslope only 50 m.

294 A separate analysis was performed, with lower coefficients of restitution, resembling  
295 that of talus material on the slope ( $n_{COR}=0.32$ ,  $t_{COR}=0.82$ ,  $\varphi=30^\circ$ ) as proposed by the  
296 suggested values provided in the documentation of the software. In this case, the  
297 rock block rolled only a few meters downslope. Therefore, it is evident that the actual  
298 rock trajectory cannot be simulated.

299 In order to simulate the actual trajectory as much as possible, various combinations  
300 of restitution coefficients and friction angle were considered. The closest match  
301 occurred for  $n_{COR}=0.60$  and  $t_{COR}=0.85$ , while the friction angle was set to zero and no  
302 velocity scaling was applied. Only in such an analysis, the rock block reaches the  
303 house; with a velocity equal to  $v=18$  m/s approximately (Fig. 6; case 2). According to  
304 the suggested values, these values for the coefficients correspond to a bedrock  
305 material (limestone).

306 In this case, the modelled trajectory is significantly different from the actual one. The  
307 main difference is that the block is rolling up to 200 m downslope while the actual  
308 rolling section is 400 m (as shown in Fig. 6). Furthermore the impacts on the ground  
309 in the bouncing section of the trajectory are considerably different in number (14  
310 versus 23) and in location from the actual ones. Finally, the bounce height of some  
311 impacts seems unrealistically high.

## 312 6.2. 3-D rockfall analysis



313 The rockfall trajectory model Rockyfor3D (Dorren, 2012) has been used in order to  
314 validate the encountered trajectory and determine the reach probability of the falling  
315 rock (from the specific source area) on the impacted house.

316 The 3D analysis was based on the down-scaled 2 m resolution Digital Elevation  
317 Model (DEM) that was generated from the 10 cm DSM. The terrain features such as  
318 low vegetation (e.g. bushes) and the trees were removed from the DEM as they  
319 affected the rock's path downhill. The following raster maps were developed for the  
320 3D analysis: a) rock density of rockfall source, b) height, width, length and shape of  
321 block, c) slope surface roughness and d) soil type on the slope, which is directly  
322 linked with the normal coefficient of restitution,  $n_{COR}$ .

323 The slope roughness was modeled using the mean obstacle height (MOH), which is  
324 the typical height of an obstacle that the falling block encounters on the slope at a  
325 possibility percentage of 70%, 20% and 10% of the trajectories (according to the  
326 suggested procedure in Rockyfor3D). No vegetation was considered in the analysis,  
327 which favours a longer trajectory. The parameters considered in the 3D analysis for  
328 the different formations are summarised in Table 4. The spatial occurrence of each  
329 soil type is shown in Figure 11 and the assigned values of  $n_{COR}$  are according to the  
330 Rockyfor3D manual. The values for soil type 4.1 are slightly different from soil type 4  
331 (proposed in the manual), denoting talus with a larger percentage of fallen boulders.  
332 The block dimensions were considered equal to  $2\text{ m}^3$  and the shape of the boulder  
333 was rectangle. In order to simulate the initial velocity of the falling rock due to the  
334 earthquake an additional initial fall height is considered in the analysis, which for this  
335 case was equal to 0.5 m.

336 The energy line angles were recalculated from the simulated trajectories and it was  
337 determined that the energy line angle with highest frequency (39%) was  $30\text{-}31^\circ$ .  
338 Based on the 3D analysis no rock blocks would impact the house, although the rock



339 paths are closer to the actual trajectories compared to RocFall software. The reach  
340 probability of the falling rocks, initiating from the source point, is shown in Figure 12.

### 341 **6.3. Lateral dispersion & Deviation**

342 Lateral dispersion is defined as the ratio between the distance separating the two  
343 extreme fall paths (as seen looking at the face of the slope) and the length of the  
344 slope (Azzoni and de Freitas 1995). According to Crosta and Agliardi (2004) the  
345 factors that control lateral dispersion are classified in three groups: macro-  
346 topography factors, factors related to the overall slope geometry; micro-topography  
347 factors controlled by the slope local roughness; and dynamic factors, associated with  
348 the interaction between slope features and block dynamics during bouncing and  
349 rolling. Assessing the results of an experimental investigation, Azzoni and de Freitas  
350 (1995) commented that the dispersion is generally in the range of 10% to 20%,  
351 regardless of the length of the slope and that steeper slopes present smaller  
352 dispersion. Agliardi and Crosta (2003) calculated lateral dispersion to be up to 34%,  
353 via high-resolution numerical models on natural rough and geometrically complex  
354 slopes.

355 Lateral dispersion cannot be defined from the actual rockfall event in Ponti since only  
356 one path is available. Using the simulated trajectories from RockyFor3D, which are in  
357 the 3d space (Figure 13), a lateral dispersion of approximately 60% is shown in the  
358 middle of the distance between detachment point and the house. This is significantly  
359 higher compared to the findings of Azzoni and de Freitas (1995) and Agliardi and  
360 Crosta (2003). Moreover, based on the actual event and intuition, the lateral  
361 dispersion computed by RockyFor3D is extremely pronounced. Examining Figure 13,  
362 it is notable that the rock paths are severely affected by the topography factors.  
363 Therefore, assessing lateral dispersion seems to be a case specific task.

364 Asteriou & Tsiambaos (2016) defined deviation ( $\epsilon$ ) as the dihedral angle between the  
365 pre- and post-impact planes that contain the trajectory. They found that deviation is



366 controlled by the direction difference  $\Delta\phi$ , the slope inclination and the shape of the  
367 block. For a parallel impact (i.e.  $\Delta\phi=0^\circ$ ) a spherical block presents significantly less  
368 deviation compared to a cubical. Additionally, deviation is equally distributed along  
369 the post-impact direction and reduces as the slope's inclination increases. On oblique  
370 impacts the block's direction after impact changes towards the aspect of slope and  
371 as  $\Delta\phi$  increases this trend becomes more pronounced.

372 Figure 14 presents deviation as a function of direction difference. It is noted that for  
373 parallel impacts deviation is also equally distributed along the post-impact direction.  
374 As direction difference increases, deviation becomes positive, which means that the  
375 change of direction is following the direction of slope's aspect. These finding are in  
376 line with trends described by Asteriou & Tsiambaos (2016), but the deviation of the  
377 actual trajectory is significantly lower. This can be attributed to the different  
378 conditions (i.e. block shape, slope material, slope roughness, incident velocity and  
379 angle, and scale) between the experimental program conducted by Asteriou &  
380 Tsiambaos (2016) and the Ponti rockfall event.

## 381 **7. Discussion - conclusions**

382 UAV-enabled reconnaissance was successfully used for the identification of the  
383 origin of the detached rock, the rockfall trajectory and the impact points on the slope,  
384 emphasizing on the motion types of the trajectory (rolling and bouncing sections). A  
385 drone with an ultra-high definition (UHD) camera was deployed to reach the  
386 inaccessible, steep and vegetated uphill terrain. A high-resolution orthophoto of the  
387 rockfall trajectory and a 10 cm DSM was prepared, which formed the basis for an  
388 analytical 2D kinematic analysis and a comparison with the outcomes of 2D and 3D  
389 rockfall analysis software.

390 The initial velocity of the detached rock was estimated based on site conditions and  
391 amplification of the ground acceleration due to topography. It was found that the



392 estimation of the initial velocity of the blocks plays a significant role in the accurate  
393 re-production of the rockfall trajectory.

394 Based on the analytical analysis performed, it was found that the coefficients of  
395 restitution cannot be directly connected to the material type, nor can be considered  
396 as constants. The impact angle seems to pose a consistent effect on normal COR,  
397 which has been seen also in other recent relevant studies, but has not been  
398 incorporated yet on analyses models.

399 Performing a 2D rockfall analysis with the set of parameters recommended by the  
400 developers, was impossible to replicate the actual trajectory revealing some  
401 limitations in the present formulations. In an attempt to match the actual rock path to  
402 the analysis output, the friction angle of the limestone slope was considered equal to  
403 zero. However, the falling rock rolled on the slope and stopped much earlier than its  
404 actual runout distance while the impacts on the ground in the bouncing section of the  
405 trajectory were considerably different in number and in location compared to the  
406 actual ones.

407 Using the 3D analysis software, some rock trajectories better approximated the  
408 actual trajectory using the suggested values by the software developers, testifying  
409 that the 3D analysis can be more accurate than the 2D analysis.

410 Based on the aforementioned analyses it becomes evident that engineering  
411 judgement and experience must accompany the usage of commercial rockfall  
412 software in order to acquire realistic paths. One should never rest on the suggested  
413 set of parameters since the actual outcome can differ significantly, as demonstrated  
414 by this case study.

415

## 416 References





- 417 1. Agliardi F, Crosta GB (2003) High resolution three-dimensional numerical  
 418 modelling of rockfalls. International Journal of Rock Mechanics and Mining  
 419 Sciences 40:455-471. doi: 10.1016/S1365-1609(03)00021-2
- 420 2. Asteriou P, Saroglou H, Tsiambaos G (2012). Geotechnical and kinematic  
 421 parameters affecting the coefficients of restitution for rock fall analysis.  
 422 International Journal of Rock Mechanics and Mining Sciences 54:103-113.  
 423 doi:10.1016/j.ijrmms.2012.05.029.
- 424 3. Asteriou P and Tsiambaos G. (2016). Empirical Model for Predicting Rockfall  
 425 Trajectory Direction. Rock Mechanics and Rock Engineering 49.3, pp. 927–  
 426 941.
- 427 4. Azzoni A, de Freitas MH (1995). Experimentally gained parameters, decisive  
 428 for rock fall analysis. Rock Mechanics and Rock Engineering 28:111-124. doi:  
 429 10.1007/BF01020064
- 430 5. Crosta GB, Agliardi F (2004) Parametric evaluation of 3D dispersion of  
 431 rockfall trajectories. Natural Hazards and Earth System Science 4:583-598.  
 432 doi:10.5194/nhess-4-583-2004
- 433 6. Descoeurdes F, Zimmermann TH. Three-dimensional dynamic calculation of  
 434 rockfalls. In: Proceedings of the 6th International Congress on Rock  
 435 Mechanics. Montreal; 30 August -3 September 1987. p. 337–42.
- 436 7. Dorren, L.K.A., 2012. Rockyfor3D (v5.1) revealed - Transparent description of  
 437 the complete 3D rockfall model. ecorisQ paper, 31 p.
- 438 8. Ganas, A., Briole, P., Papathanassiou, G., Bozionelos, G., Avallone, A.,  
 439 Melgar, D., Argyrakis, P., Valkaniotis, S., Mendonidis, E., Moshou, A. and  
 440 Elias, P. (2015). A preliminary report on the Nov 17, 2015 M=6.4 South  
 441 Lefkada earthquake, Ionian Sea, Greece, Report to EPPO, December 4  
 442 2015.



- 443 9. Ganas A., Elias P., Bozionelos G., Papathanassiou G., Avallone A.,  
 444 Papastergios P. Valkaniotis S., Parcharidis I., Briole P. (2016). Coseismic  
 445 deformation, field observations and seismic fault of the 17 November 2015 M  
 446 = 6.5, Lefkada Island, Greece earthquake. *Tectonophysics* 687, pp. 210–222.
- 447 10. Giani GP. *Rock Slope Stability Analysis*. Rotterdam: Balkema A.A; 1992.
- 448 11. Giacomini A, Thoeni K, Lambert C, Booth S, Sloan SW (2012) Experimental  
 449 study on rockfall drapery systems for open pit highwalls. *International Journal*  
 450 *of Rock Mechanics and Mining Sciences* 56:171-181.  
 451 doi:10.1016/j.ijrmms.2012.07.030
- 452 12. Heidenreich B (2004) Small- and half-scale experimental studies of rockfall  
 453 impacts on sandy slopes. Dissertation, EPFL.
- 454 13. ITSAK (2016). Preliminary presentation of the main recording of ITSAK –  
 455 OASP accelerometer network in Central Ionian. Earthquake M6.4 17/11/2015.  
 456 Thessaloniki, 11 pp.
- 457 14. Karakostas, V. G., Papadimitriou, E. E., and Papazachos, C. B. 2004.  
 458 Properties of the 2003 Lefkada, Ionian Islands, Greece, Earthquake Seismic  
 459 Sequence and Seismicity Triggering. *Bulletin of the Seismological Society of*  
 460 *America*, 94 (5), 1976–1981, October 2004
- 461 15. Manousakis J., Zekkos D., Saroglou H., Clark M. (2016). Comparison of UAV-  
 462 enabled photogrammetry-based 3D point clouds and interpolated DSMs of  
 463 sloping terrain for rockfall hazard analysis. *Proc. Int. Archives of the*  
 464 *Photogrammetry, Remote Sensing and Spatial Information Sciences*, Vol.  
 465 XLII-2/W2, p. 71-78.
- 466 16. Marinos P, Tsiambaos G., 2002. Earthquake triggering rock falls affecting  
 467 historic monuments and a traditional settlement in Skyros Island, Greece.

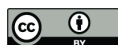

- 468 Proc. of the Int. Symposium: Landslide risk mitigation and protection of  
 469 cultural and natural heritage, Kyoto, Japan, pp. 343-346.
- 470 17. Mavrouli O., Corominas J., Wartman J. (2009). Methodology to evaluate rock  
 471 slope stability under seismic conditions at Sol'a de Santa Coloma, Andorra.  
 472 Nat. Hazards Earth Syst. Sci., 9, 1763–1773. Micheletti N., Chandler J., Lane  
 473 S., 2015. Structure from Motion (SfM) Photogrammetry. British Society for  
 474 Geomorphology. *Geomorphological Techniques*, Chap. 2, Sec. 2.2 (2015)
- 475 19. Papathanassiou, G., Valkaniotis, S., Ganas, A. and Pavlides, S. 2012. GIS-  
 476 based statistical analysis of the spatial distribution of earthquake-induced  
 477 landslides in the island of Lefkada, Ionian Islands, Greece, Landslides,  
 478 Journal of the International Consortium on Landslides, DOI 10.1007/s10346-  
 479 012-0357-1
- 480 20. Papazachos B.C., Papadimitriou E.E., Kiratzi A.A., Papazachou C.B., Louvari  
 481 E.K. 1998. Fault plane solutions in the Aegean sea and the surrounding area  
 482 and their tectonic implication. Bull Geof Teor Appl 39(3), 199–218.
- 483 21. Paronuzzi P. (2009) Field Evidence and Kinematical Back-Analysis of Block  
 484 Rebounds: The Lavone Rockfall, Northern Italy. *Rock Mech Rock Eng*,  
 485 42:783–813
- 486 22. Richards LR, Peng B, Bell DH (2001) Laboratory and field evaluation of the  
 487 normal Coefficient of Restitution for rocks. Proceedings of ISRM Regional  
 488 Symposium EUROCK2001:149-155
- 489 23. RocScience, 2004. Rocfall Manual.
- 490 24. Rondoyanni T, Sakellariou M, Baskoutas J, Christodoulou N (2012)  
 491 Evaluation of active faulting and earthquake secondary effects in Lefkada  
 492 Island, Ionian Sea, Greece: an overview. Nat Hazards 61(2), 843–860.



- 493 25. Saroglou, H. 2013. Rockfall hazard in Greece. Bulletin of the Geological  
 494 Society of Greece, vol. XLVII, no3, 1429-1438.
- 495 26. Saroglou, H., Marinos, V., Marinos, P., Tsiambaos, G. 2012. Rockfall hazard  
 496 and risk assessment: an example from a high promontory at the historical site  
 497 of Monemvasia, Greece. Natural Hazards and Earth System Sciences, 12,  
 498 1823–1836. doi:10.5194/nhess-12-1823-2012.
- 499 27. Snavely N., Seitz S.N., Szeliski R., 2008. Modeling the world from internet  
 500 photo collections. *International Journal of Computer Vision* 80: 189-  
 501 210. Westoby M.J., Brasington J., Glasser N.F., Hambrey M.J., Reynolds  
 502 J.M., 2012. 'Structure-from-Motion' photogrammetry: A low-cost, effective tool  
 503 for geoscience applications. *Geomorphology* 179 (2012) 300-314. Wyllie, D.  
 504 C. (2014). Calibration of rock fall modeling parameters. *International Journal*  
 505 *of Rock Mechanics and Mining Sciences* 67: 170-180
- 506 30. Zekkos D., Clark M., Cowell K., Medwedeff W., Manousakis J., Saroglou H.  
 507 Tsiambaos G. (2017). Satellite and UAV-enabled mapping of landslides  
 508 caused by the November 17<sup>th</sup> 2015 M<sub>w</sub> 6.5 Lefkada earthquake. Proc. 19<sup>th</sup> Int.  
 509 Conference on Soil Mechanics and Geotechnical Engineering, Seoul 2017  
 510 (accepted for publication).

511



511

## TABLES

512

Table 1. Accelerometer recordings

| Component | Acceleration (cm/sec <sup>2</sup> ) | Velocity (cm/sec) | Displacement (cm) |
|-----------|-------------------------------------|-------------------|-------------------|
| NS-comp   | 363                                 | 59.3              | 21.27             |
| EW-comp   | 327                                 | 34.1              | 14.01             |
| Z-comp    | 256                                 | 17.7              | 6.56              |

513

514 Table 2. Impact points characteristics

| Impact point | X (m)  | Y (m)  | app_dip (°) | $\Delta\phi$ (°) | e (°) |
|--------------|--------|--------|-------------|------------------|-------|
| 1            | 287.63 | 338    | 39.0        | 0                | 0     |
| 2            | 298.38 | 329.68 | 16.3        | 33               | 0     |
| 3            | 305.48 | 324.5  | 27.9        | 27               | -1    |
| 4            | 321.54 | 314.83 | 41.0        | 11.6             | 0.5   |
| 5            | 365.34 | 287.6  | 30.4        | 11.9             | 0.3   |
| 6            | 373.32 | 284.85 | 39.7        | 10.6             | 1.8   |
| 7            | 425.1  | 261.64 | 14.7        | 6.6              | -1.3  |
| 8            | 464.43 | 251.13 | 18.4        | 33.3             | 0.8   |
| 9            | 472.06 | 248.81 | 14.0        | 19.1             | 2.3   |
| 10           | 495.29 | 243.81 | 7.5         | 52.3             | 0.9   |
| 11           | 515.31 | 240.8  | 7.9         | 51               | 0.6   |
| 12           | 535.56 | 238.31 | 9.1         | 46.7             | 3     |
| 13           | 562.11 | 232.22 | 8.7         | 47.3             | 2.1   |
| 14           | 605.51 | 211.12 | 16.9        | 25.6             | -1.7  |
| 15           | 619.1  | 204.48 | 27.1        | 4.6              | -3    |
| 16           | 639.13 | 196.96 | 21.2        | 8                | 4.7   |
| 17           | 662.41 | 184    | 23.3        | 28.5             | 5.2   |
| 18           | 688.4  | 169.3  | 27.4        | 0.3              | -2.5  |
| 19           | 712.23 | 157.67 | 25.4        | 0.5              | 0.1   |
| 20           | 745.28 | 143.16 | 21.9        | 0.5              | -0.1  |
| 21           | 762.9  | 137.01 | 22.0        | 0.7              | 2     |
| 22           | 789.23 | 125.98 | 21.6        | 1.4              | -0.8  |
| 23           | 801.53 | 132.75 | 8.4         | 0.2              | 0.1   |



515 Table 3. Parabolic paths characteristics for the minimum release velocity

| Segment | $\Delta x(m)$ | $\Delta y(m)$ | $\theta_{cr} (^{\circ})$ | $v_{r,min}$ | $v_{impact}$ | $a_{impac}$<br>$t$ | R    | Rn   | Rt   |
|---------|---------------|---------------|--------------------------|-------------|--------------|--------------------|------|------|------|
| 1-2     | 10.75         | -8.33         | 26.8                     | 7.19        | 13.19        | 44.5               | 0.55 | 0.71 | 0.31 |
| 2-3     | 7.1           | -5.18         | 25.7                     | 5.95        | 9.51         | 27.8               | 0.63 | 0.90 | 0.53 |
| 3-4     | 16.07         | -9.66         | 31.5                     | 9.45        | 12.68        | 9.6                | 0.75 | 3.86 | 0.38 |
| 4-5     | 43.79         | -27.23        | 27.7                     | 15.46       | 23.13        | 23.3               | 0.67 | 1.57 | 0.26 |
| 5-6     | 7.98          | -2.75         | 35.7                     | 7.47        | 10.49        | 14.9               | 0.71 | 2.52 | 0.30 |
| 6-7     | 51.78         | -23.21        | 34.8                     | 18.15       | 21.61        | 31.7               | 0.84 | 1.54 | 0.26 |
| 7-8     | 39.33         | -10.5         | 35.9                     | 17.23       | 24.01        | 36.1               | 0.72 | 0.94 | 0.56 |
| 8-9     | 7.63          | -2.32         | 35.9                     | 7.45        | 10.54        | 41.1               | 0.71 | 0.87 | 0.55 |
| 9-10    | 23.23         | -5            | 40.5                     | 13.58       | 13.12        | 30.7               | 1.03 | 1.65 | 0.70 |
| 10-11   | 20.02         | -3.01         | 41.1                     | 13.00       | 11.57        | 24.2               | 1.12 | 2.06 | 0.82 |
| 11-12   | 20.25         | -2.49         | 40.9                     | 13.26       | 11.22        | 17.6               | 1.18 | 2.94 | 0.82 |
| 12-13   | 26.55         | -6.1          | 38.0                     | 14.40       | 14.25        | 28.5               | 1.01 | 1.55 | 0.78 |
| 13-14   | 43.41         | -21.1         | 32.9                     | 16.33       | 25.70        | 40.9               | 0.64 | 0.64 | 0.63 |
| 14-15   | 13.59         | -6.64         | 30.7                     | 9.13        | 12.81        | 25.1               | 0.71 | 1.24 | 0.53 |
| 15-16   | 20.03         | -7.52         | 33.8                     | 11.67       | 15.42        | 29.8               | 0.76 | 1.33 | 0.42 |
| 16-17   | 23.27         | -12.96        | 31.9                     | 11.59       | 15.89        | 28.5               | 0.73 | 1.22 | 0.50 |
| 17-18   | 25.99         | -14.7         | 29.9                     | 12.20       | 20.11        | 30.9               | 0.61 | 0.95 | 0.42 |
| 18-19   | 23.83         | -11.63        | 32.2                     | 12.08       | 17.10        | 27.9               | 0.71 | 1.30 | 0.40 |
| 19-20   | 33.05         | -14.51        | 33.6                     | 14.55       | 20.62        | 32.1               | 0.71 | 1.14 | 0.43 |
| 20-21   | 17.62         | -6.15         | 34.5                     | 11.08       | 11.99        | 18.4               | 0.92 | 2.44 | 0.54 |
| 21-22   | 26.33         | -11.03        | 35.1                     | 13.11       | 16.33        | 27.3               | 0.80 | 1.47 | 0.49 |
| 22-23   | 12.3          | 6.77          | 58.1                     | 14.30       | 13.97        | 48.9               | 1.02 | 1.34 | 0.28 |

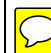

516

517



517 Table 4. Restitution parameters for Rockyfor3D

| Geological formation/ other                                                         | Mean<br>$n_{COR}$ | MOH  |      |      | Soil type<br>(Rockyfor3D) |
|-------------------------------------------------------------------------------------|-------------------|------|------|------|---------------------------|
|                                                                                     |                   | rg70 | rg20 | rg10 |                           |
| Scree ( $\emptyset < \sim 10$ cm), or medium compact soil with small rock fragments | 0.33              | 0.03 | 0.05 | 0.05 | 3                         |
| Talus slope ( $\emptyset > \sim 10$ cm), or compact soil with large rock fragments  | 0.38              | 0.05 | 0.1  | 0.2  | 4                         |
| Talus with fallen boulders                                                          | 0.42              | 0.15 | 0.15 | 0.2  | 4.1                       |
| Bedrock with thin weathered material                                                | 0.43              | 0    | 0.05 | 0.1  | 5                         |
| Asphalt road                                                                        | 0.35              | 0    | 0    | 0    | 7                         |

518



## FIGURES

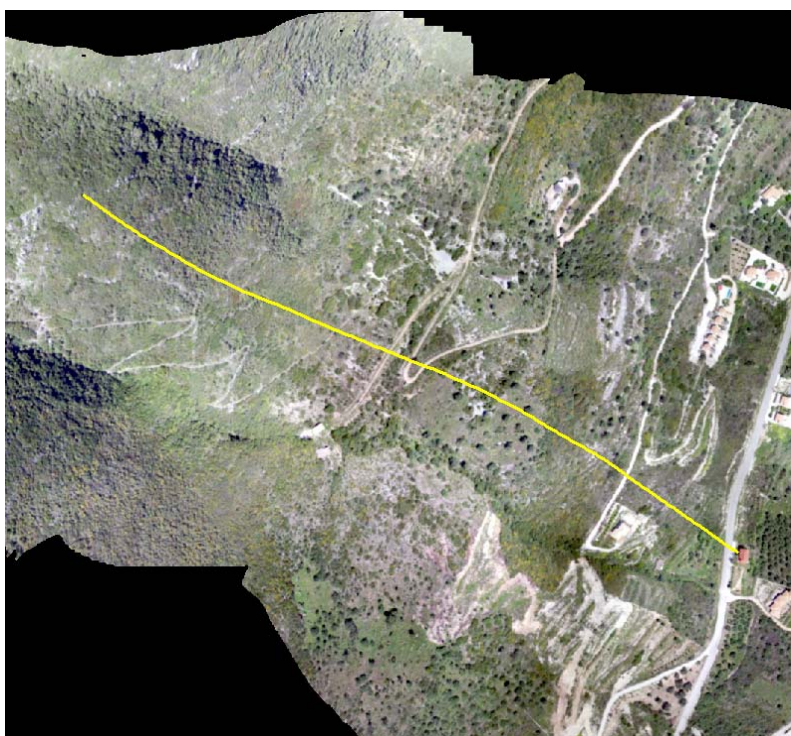

Figure 1. Orthophoto of study site showing known trajectory and impact on house.

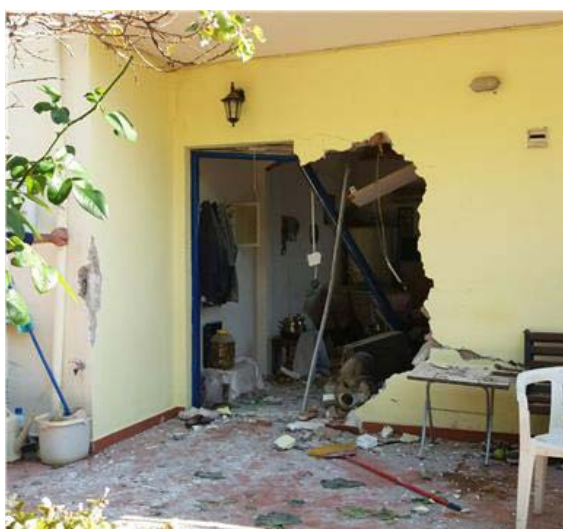

Figure 2. Impact of rock on house in Ponti, Lefkada, Greece.



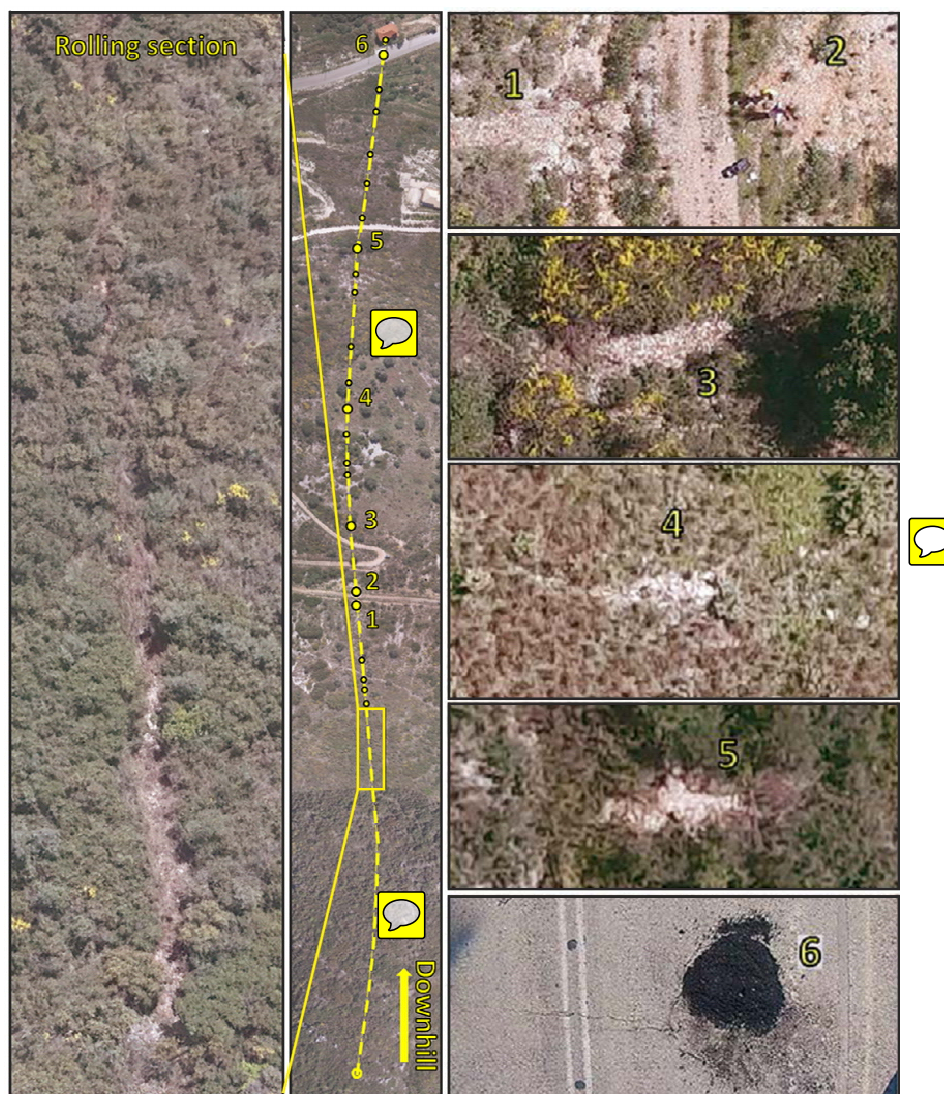

Figure 3. Top view orthophoto denoting rolling section, bouncing positions and close-ups of impact points.

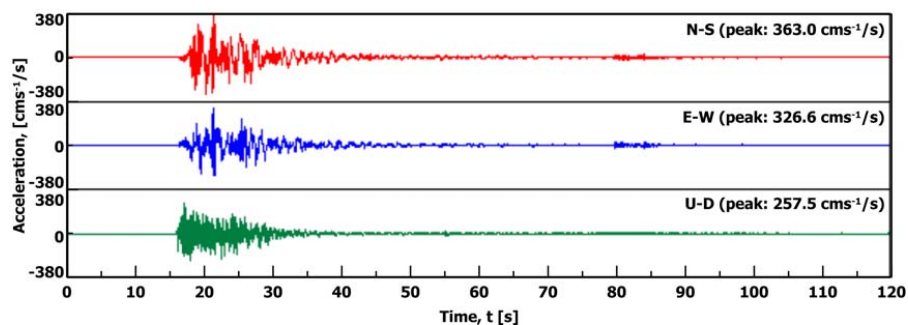

Figure 4. Acceleration recording at Vassiliki site (ITSK, 2016)

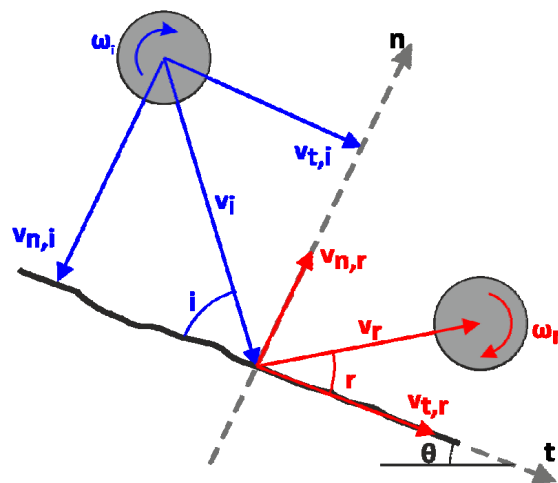

Figure 5. Coefficients of restitution

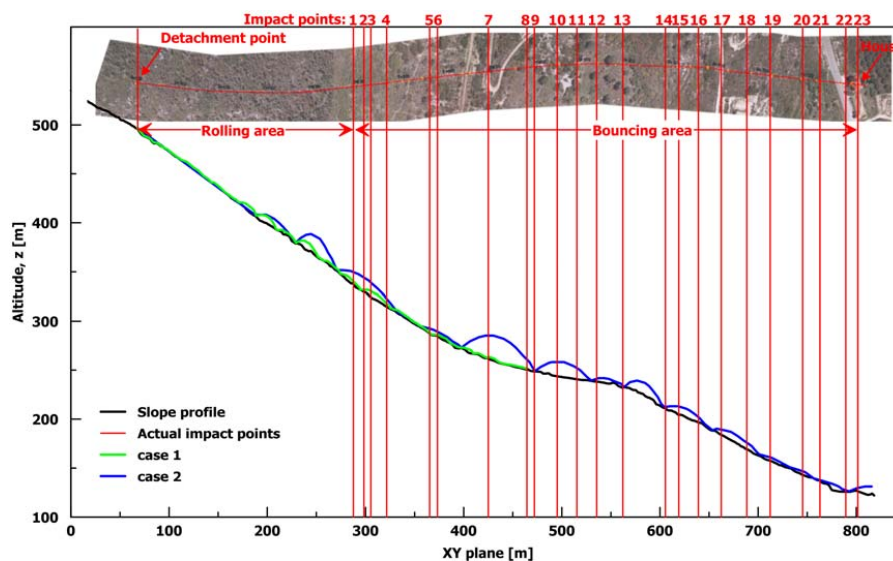

Figure 6. Plan view and cross section along block's path (units in m); 2D rockfall trajectory analysis results are plotted with green and blue line

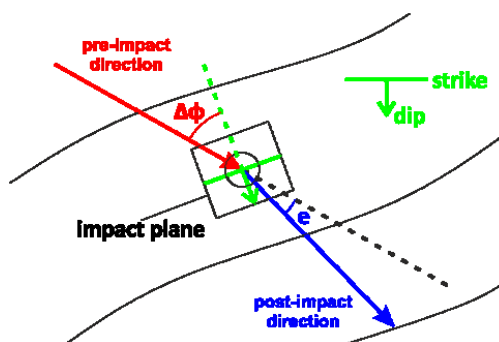

Figure 7 : Out of plane geometry

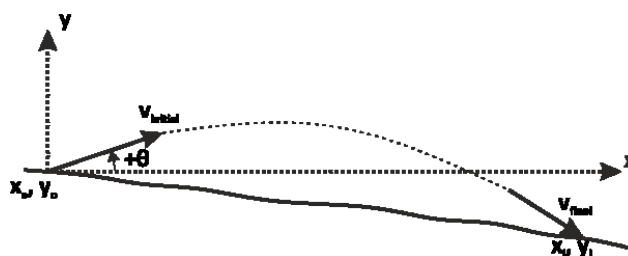



Figure 8. Parabolic segment

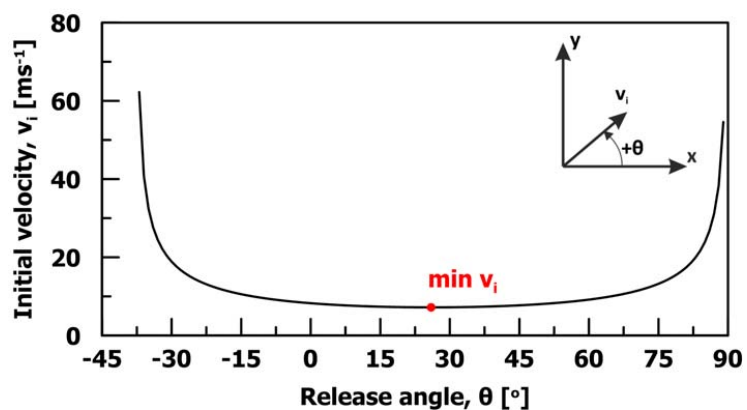

Figure 9. Release angle versus initial velocity for the first parabolic section ( $\delta x=10.75\text{m}$ ,  $\delta y=8.33\text{m}$ )

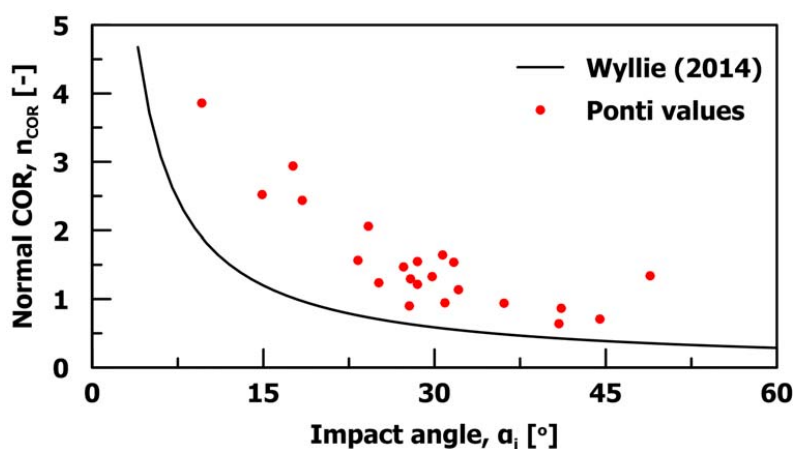

Figure 10. Normal COR versus impact angle

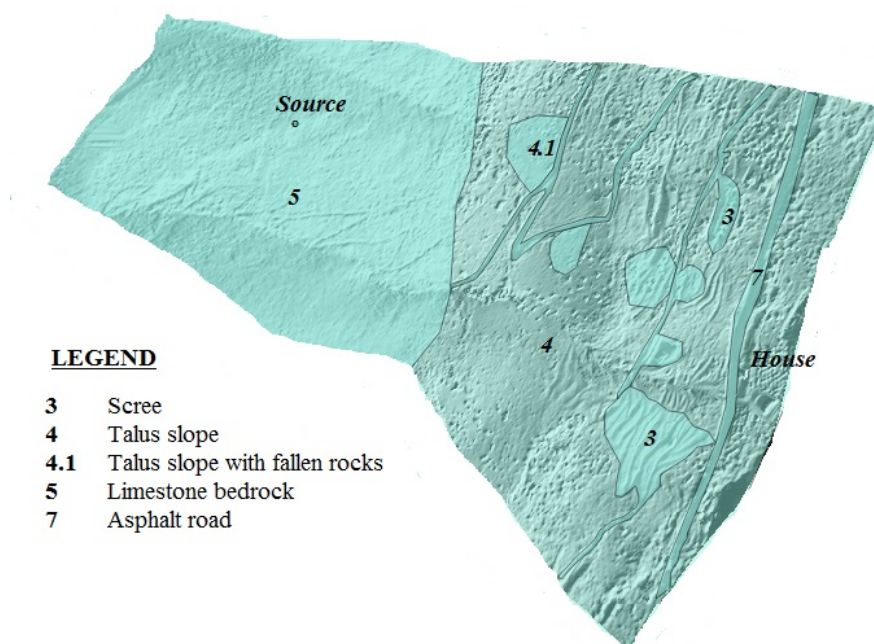

#### LEGEND

- 3 Scree
- 4 Talus slope
- 4.1 Talus slope with fallen rocks
- 5 Limestone bedrock
- 7 Asphalt road

Figure 11. Soil types for 3D rockfall analysis (according to Rockyfor3D)

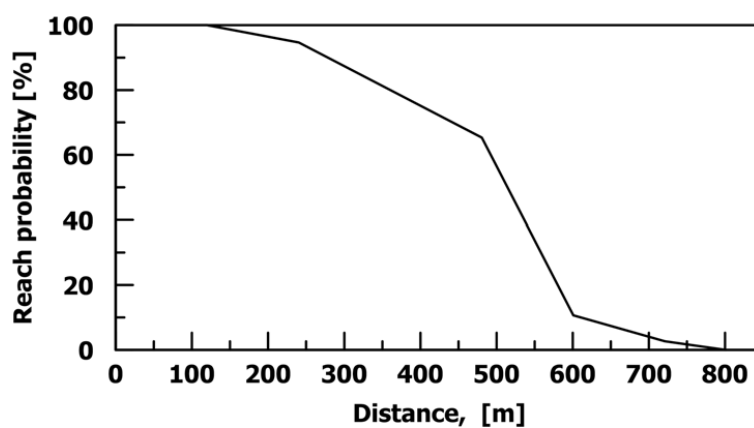

Figure 12. Reach probability graph calculated from 3D rockfall analysis



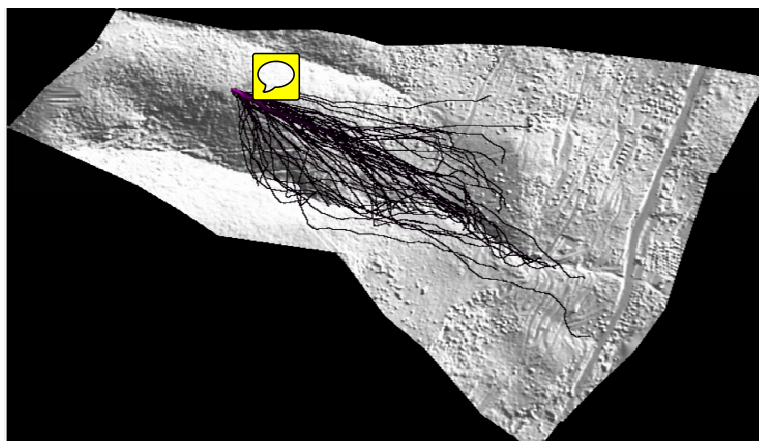

Figure 13. 3D trajectory analysis (from RockyFor3D analysis)

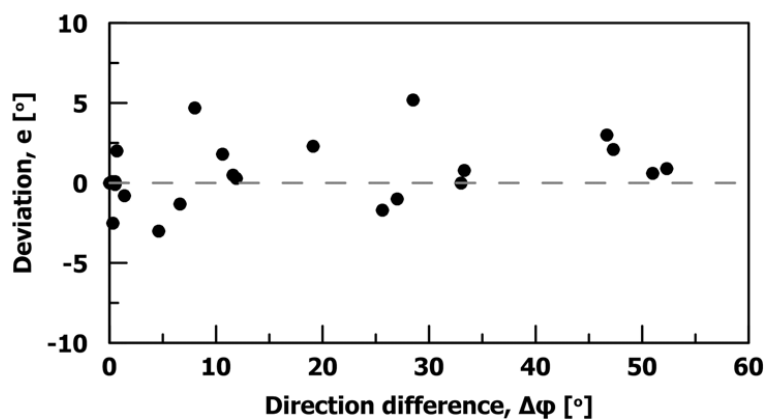

Figure 14. Deviation as a function of direction difference.
